# Supplementary material
Source: publisher site journal article supplement (https://www.dovepress.com/article/240107)
Supplement: Supplementary file 1 [file get_supplementary_file.php]

**Supplementary:**

**Table S1** Sequences for siRNAs.

| siRNA | Sequences (5'-3') |
| --- | --- |
| si-CDCP1 | GCTCATAAGAGCATCGGTTTA  TAAACCGATGCTCTTATGAGC |
| NC | UUCUCCGAACGUGUCACGU ACGUGACACGUUCGGAGAA |

**Table S2** The primers used in qRT-PCR analysis.

|  | Sense and antisense primer (5'-3') |
| --- | --- |
| GAPDH | CAGCCTCAAGATCATCAGCA  TGTGGTCATGAGTCCTTCCA |
| CDCP1 | CTGAACTGCGGGGTCTCTATC  GTCCCCAGCTTTATGAGAACTG |

**Table S3** Correlation between immunohistochemistry of CDCP1 gene and cervical cancer.

|  | Number of patients | CDCP1 protein expression | | |
| --- | --- | --- | --- | --- |
| Positive | Negative | P valuea |
| Patients | | | | |
| Cervical cancer tissue | 100 | 64(64%) | 36(36%) | 0.018 |
| Normal cervical tissue | 10 | 2(20%) | 8(80%) |
| Age(years)b | | | | |
| ≤48c | 54 | 38(70.37%) | 16(29.63%) | 0.15 |
| ＞48 | 46 | 26(56.52%) | 20(43.48%) |
| FIGO stageb | | | | |
| Ⅰ | 56 | 33(58.93%) | 23(41.07%) | 0.266 |
| Ⅱ~Ⅲ | 43 | 30(69.77%) | 13(30.23%) |
| Pathological gradeb | | | | |
| 1 | 8 | 5(62.50%) | 3(37.50%) | 1.0 |
| 2~3 | 85 | 56(65.88%) | 29(34.12%) |

**Notes:** CDCP1 was higher in cervical cancer tissues compared with normal cervix epithelia tissues (P = 0.018), while there was no significant association between CDCP1 and clinicopathological features including age (P = 0.15), FIGO stage (P = 0.266) and pathological grade (P = 1.0).

a P value are from Chi-square test.

b Non-cancerous and data-deficient samples were excluded.

c Mean age
